# Supplementary material
Source: Springer Nature journal article supplement (https://www.springermedizin.de/resource/supplementary/12936_2014_3326_MOESM15_ESM.pdf/9545666)
Supplement: MOESM15 [file 9545666]

|      |     |     |     |      |     |     |     |      |
|------|-----|-----|-----|------|-----|-----|-----|------|
| 10.0 | 0.7 | 0.0 | 0.8 | 14.8 | 0.4 | 0.2 | 1.0 | 11.5 |
|------|-----|-----|-----|------|-----|-----|-----|------|

62.8

|     |     |     |
|-----|-----|-----|
| 0.0 | 0.0 | 0.4 |
| 1.0 | 0.6 | 0.4 |
| 5.7 | 8.2 | 7.2 |
